# Supplementary material for: Reference-based QUantification Of gene Dispensability (QUOD)
Source: PubMed Central journal article supplement (PMC7871624; doi:10.1186/s13007-021-00718-5), 2021-02-09
Supplement: 13007_2021_718_MOESM4_ESM.pdf [file 13007_2021_718_MOESM4_ESM.pdf]

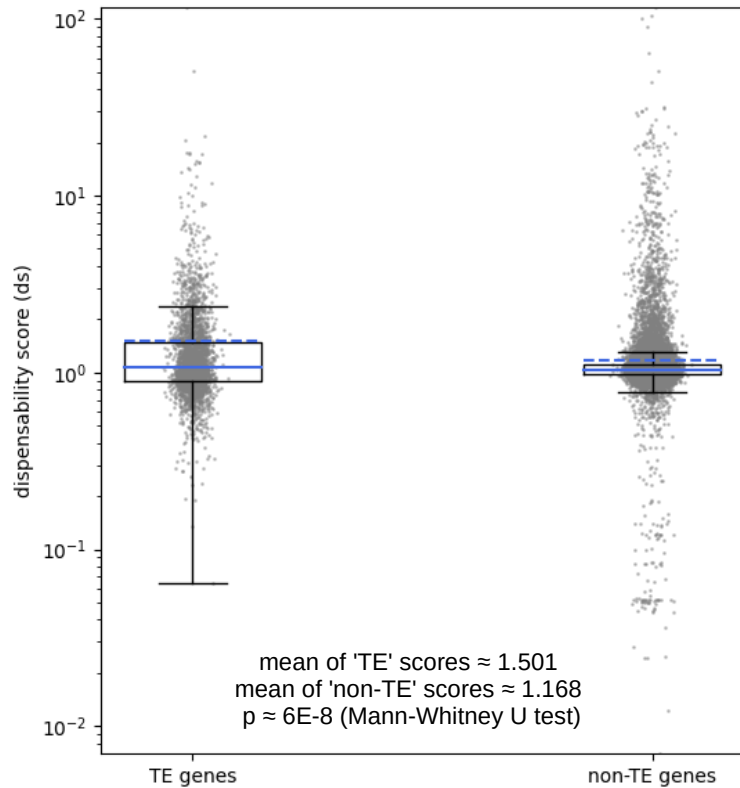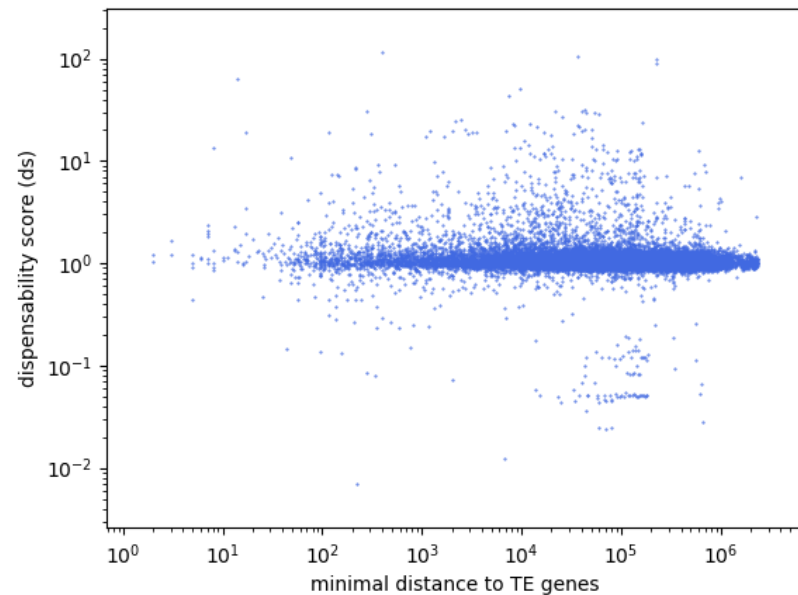

#### Mixed Linear Model Regression Results

```

=====
Model:          MixedLM  Dependent Variable: score
No. Observations: 27247  Method:          REML
No. Groups:      1       Scale:           2.8547
Min. group size: 27247  Log-Likelihood: -52971.1449
Max. group size: 27247  Converged:       Yes
Mean group size: 27247.0
  
```

```

-----
Coef. Std.Err. z P>|z| [0.025 0.975]
-----

```

```

Intercept  1.220  1.690  0.722  0.470 -2.091  4.532
distance_TE -0.000  0.000 -6.844  0.000 -0.000 -0.000
Group Var   2.855
  
```

**Figure S4:** Scores of TE genes and non-TE genes (left) and correlation of the distance to the closest TE gene with the gene-dispensability score (right) of the *A. thaliana* dataset. TE genes show significantly higher scores than non-TE genes ( $p \approx 6E-8$ ; Mann-Whitney U test). Linear mixed modelling shows that there is no relationship between the distance to the closest TE gene and the dispensability score.
