# Supplementary material for: Reference-based QUantification Of gene Dispensability (QUOD)
Source: PubMed Central journal article supplement (PMC7871624; doi:10.1186/s13007-021-00718-5), 2021-02-09
Supplement: 13007_2021_718_MOESM9_ESM.pdf [file 13007_2021_718_MOESM9_ESM.pdf]

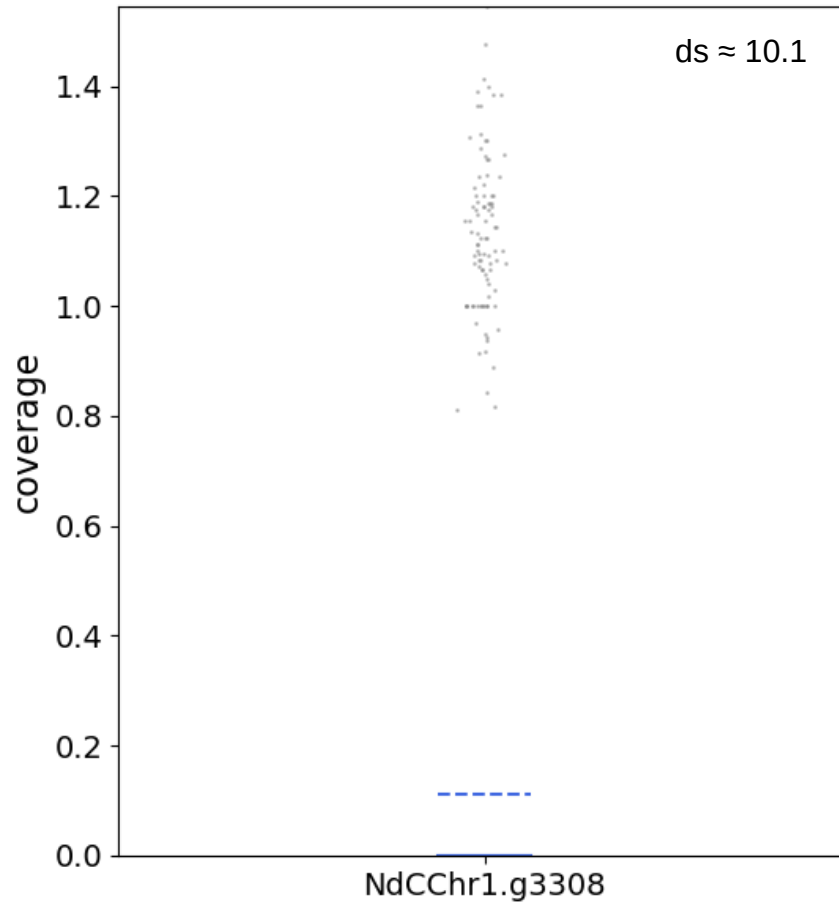

**Figure S9:** Example for lineage specific adaptation. The gene NdCChr1.g3308 (Nd-1 annotation nomenclature) ( $ds \approx 10.1$ ) has zero coverage in 870 accessions ( $\approx 90\%$ ) and is annotated as resistance gene mediating resistance against the bacterial pathogen *Pseudomonas syringae*.
