# Supplementary material for: Reference-based QUantification Of gene Dispensability (QUOD)
Source: PubMed Central journal article supplement (PMC7871624; doi:10.1186/s13007-021-00718-5), 2021-02-09
Supplement: 13007_2021_718_MOESM11_ESM.pdf [file 13007_2021_718_MOESM11_ESM.pdf]

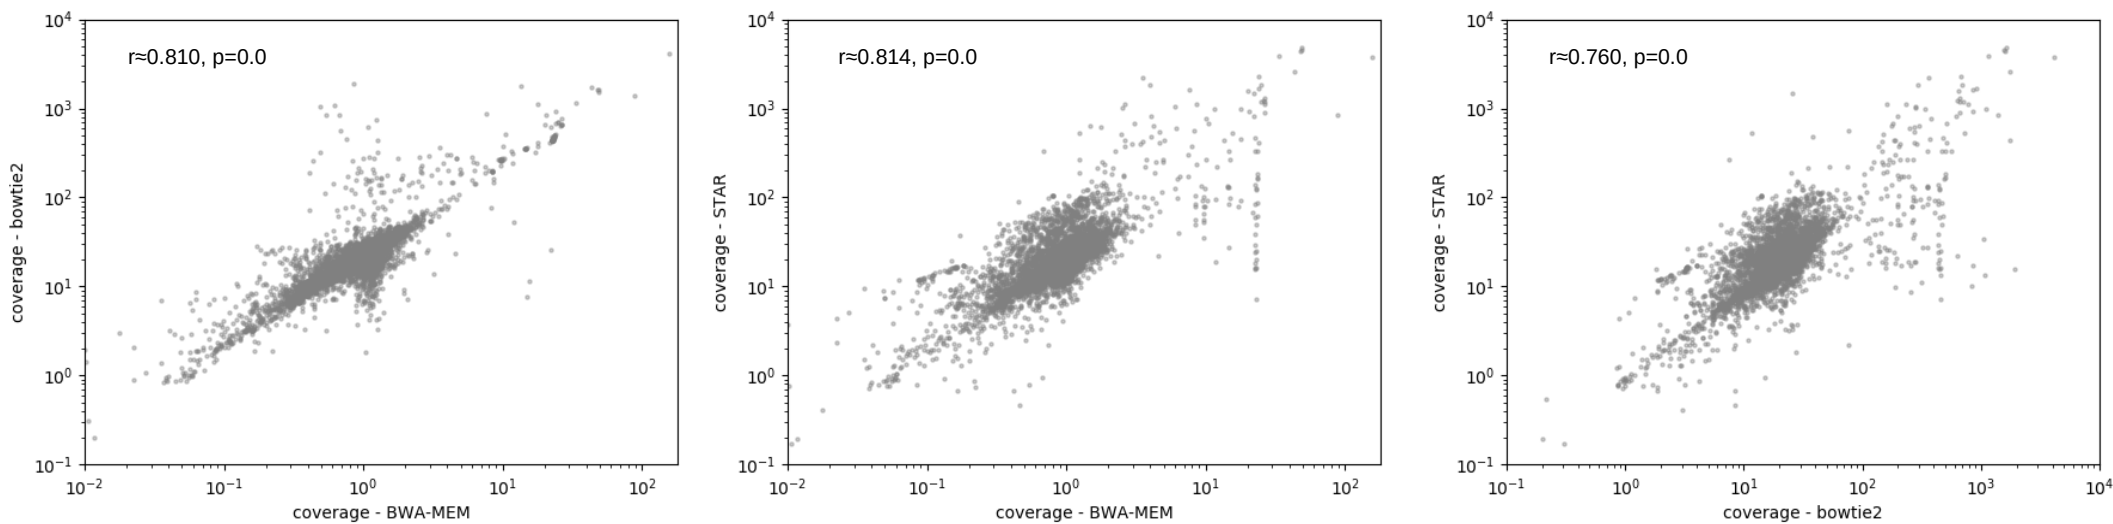

**Figure S11:** Coverage comparison using different read mappers (BWA-MEM, bowtie2, STAR). Spearman correlation coefficient was used to determine the correlation and the significance of the results. The coverages of the genes using different mappers correlate significantly.
